# Supplementary material
Source: PubMed Central journal article supplement (PMC5778362)
Supplement: IAI.00635-17_zii999092274s2.pdf [file IAI.00635-17_zii999092274s2.pdf]

Table S1: Oligonucleotide sequences used in this study.

| Primer Name       | Oligonucleotide sequences (5' to 3')                           |
|-------------------|----------------------------------------------------------------|
| 5'P2 m            | CACCAAATTAATCCCCACAATTATGTTATTCGTGCCCACTCTTCATAG<br>TTGGTTATTC |
| 3' P2m            | TAAATTATTAATAAATAACATTAATTTAGG                                 |
| 5'P3m             | AATTTTTTCATTTTTCCCAAAAATTTTGAAAAATCCACTCAAATAGT<br>AGAAGAAGT   |
| 3'P3m             | TTTATAATTTTTTAAATTTAGTAATTCTCAGTGC                             |
| 5'P1m             | TAAACACTTTTTTGCCCCAATCATTTTTAAATTAGTCCACTCTAACTA<br>AATAATAGAG |
| 3'P1m             | TAAAACAAATTATTCATTAGACACAGTGATTG                               |
| 5' teg49 deletion | TTGTTTACTTCTCATTTTTAATTAGTTAT                                  |
| 3' teg49 deletion | TTAACTCTTCCAAGTTAACTTCTTCTACTA                                 |
| 5'teg48 deletion  | TATATTATCGGGCAAATGTATCGAGCAA                                   |
| 3' teg48 deletion | TATATTTAATGCTCTATTATTTAGTTAA                                   |
| Teg49 F           | GAATATCGAAACATTTAATTGCGCTA                                     |
| Teg49R            | AAACAAATTATTCATTAG ACACAGT                                     |
| SaoUHSC_2167F     | ACTTGCGGGAACTTTAGCAATCGT                                       |
| SaoUHSC_2167R     | AGTGCTTCGTCAATTTTCGTTATAA                                      |
| SaoUHSC_2160F     | AGTGAAATTCAGTAACAATAAATA                                       |
| SaoUHSC_2160R     | AGAATTTAAGTTCAATATCTACCTT                                      |
| SaoUHSC_0401F     | AGGTTTTAGTAGCTACGGCAAT                                         |
| SaoUHSC_0401R     | ACGTGTTTCATATTTTGAAACATCA                                      |
| SaoUHSC_2841F     | AAGTATGCACCGTACGGTAAACA                                        |
| SaoUHSC_2841R     | ACCTGTACATGTTAGTGCTCCA                                         |
| SaoUHSC_0715F     | TGACCCACTTACTGATCGTG                                           |
| SaoUHSC_0715R     | CGTAACCATTAACTTCTGGCATC                                        |
| SaoUHSC_2235F     | GTACAATCACCCGACCAAGATAG                                        |
| SaoUHSC_2235R     | GGGAGGTGTGAGTTGAGAAAA                                          |
| SaoUHSC_1575F     | AACAAACTCACACCTCCCC                                            |
| SaoUHSC_1575R     | AAACGTTCTCCTACACCAGC                                           |
| SaoUHSC_0383F     | GGGTAAACACTATTTAGAAGTCACAG                                     |
| SaoUHSC_0383R     | CACATCTATATTTGAGTTTTCTCCGTC                                    |
| SaoUHSC_1114F     | TCGAATATGGTGCACGTCC                                            |
| SaoUHSC_1114R     | ACTGCCTTTTGTGCTTTTCTG                                          |
| SaoUHSC_0121F     | GGTGTTCCTGCAAAGTGATTAAG                                        |
| SaoUHSC_0121R     | AAATCCTTTTAGTTTGTGTCAGGCG                                      |
| SaoUHSC_2708F     | CAACATTGTCACACGAAAGAGG                                         |
| SaoUHSC_2708R     | GGCTAAACGATGTCTTGTCAC                                          |
| SaoUHSC_2241F     | ACGAAATGGAAATTTATGGGCG                                         |
| SaoUHSC_2251R     | GAAACCATGGCGATTCCAATC                                          |
| SaoUHSC_0241F     | ATGAGCATTGTTGCATTACTTATC                                       |
| SaoUHSC_0241R     | ATGACCAATGCCTGGCCAATT                                          |
| SaoUHSC_1147F     | CAAACACGCTAGCAACACAG                                           |

|               |                             |
|---------------|-----------------------------|
| SaoUHSC_1147R | ACCGATTTCCCTTGACTATTACC     |
| SaoUHSC_1925F | ATGGATAGATTAATAATTCACCTT    |
| SaoUHSC_1925R | TCATTTCTTTAAAATTCCTAAAAATAT |
| SaoUHSC_0158F | GGTGGCGTATTTAGTGGATTTATC    |
| SaoUHSC_0158R | GTGTTGCGTTTACATCTTACCC      |
| SaoUHSC_1053F | AGTCGCTGTTGGTTACATGG        |
| SaoUHSC_1053R | AGTCCATACCTGTTGCTATTCC      |
| SaoUHSC_1942F | GAGTAAAGGTAAAGGCGGAGG       |
| SaoUHSC_1942R | CTTTCACCTTTTGCTCCGTCTG      |

Table S2: Upregulated gene expression in teg49 mutant versus the wild type.

| Gene designation           | Gene name or description                                          | Wild type SH1000 expression value | ALC7907, teg49 mutant expression value | Fold change |
|----------------------------|-------------------------------------------------------------------|-----------------------------------|----------------------------------------|-------------|
| <b>Metabolism</b>          | <b>and enzyme families</b>                                        |                                   |                                        |             |
| SAOUHSC_00716              | thiosulfate dehydrogenase                                         | 152                               | 27833                                  | 183.11      |
| SAOUHSC_01322, <i>thrB</i> | homoserine kinase                                                 | 49                                | 3957                                   | 80.75       |
| SAOUHSC_01320, <i>metL</i> | homoserine dehydrogenase                                          | 65                                | 4851                                   | 74.63       |
| SAOUHSC_01321, <i>thrC</i> | threonine synthase                                                | 74                                | 5296                                   | 71.57       |
| SAOUHSC_-1319, <i>thrA</i> | aspartate kinase                                                  | 13                                | 818                                    | 62.92       |
| SAOUHSC_03021              | adenosyl-fluoride synthase                                        | 9                                 | 297                                    | 33.00       |
| SAOUHSC_02283              | acetolactate synthase I regulatory subunit                        | 7                                 | 211                                    | 30.14       |
| SAOUHSC_01833, <i>serA</i> | D-3-phosphoglycerate dehydrogenase                                | 34                                | 945                                    | 27.79       |
| SAOUHSC_01832              | aminotransferase class V                                          | 46                                | 1206                                   | 26.21       |
| SAOUHSC_02284, <i>ilvC</i> | ketol-acid reductoisomerase                                       | 13                                | 311                                    | 23.92       |
| SAOUHSC_02285, <i>leuA</i> | 2-isopropylmalate synthase                                        | 12                                | 276                                    | 23.00       |
| SAOUHSC_02282, <i>ilvB</i> | acetolactate synthase large subunit                               | 14                                | 307                                    | 21.93       |
| SAOUHSC-02287, <i>leuC</i> | isopropylmalate isomerase large subunit                           | 10                                | 212                                    | 21.20       |
| SAOUHSC_02288, <i>leuD</i> | 3-isopropylmalate dehydratase small subunit                       | 10                                | 197                                    | 19.7        |
| SAOUHSC_03017              | acetyltransferase (GNAT) family                                   | 6                                 | 106                                    | 17.66       |
| SAOUHSC_02289, <i>ilvA</i> | threonine dehydratase                                             | 8                                 | 138                                    | 17.25       |
| SAOUHSC_02286, <i>leuB</i> | 3-isopropylmalate dehydrogenase                                   | 14                                | 240                                    | 17.14       |
| SAOUHSC_02924              | 4-aminobutyrate aminotransferase                                  | 39                                | 557                                    | 14.28       |
| SAOUHSC_02281, <i>ilvD</i> | dihydroxy-acid dehydratase                                        | 17                                | 229                                    | 13.47       |
| SAOUHSC_01323              | haloacid dehalogenase-like hydrolase                              | 313                               | 3967                                   | 12.67       |
| SAOUHSC_00989              | aminotransferase                                                  | 68                                | 710                                    | 10.44       |
| SAOUHSC_00733, <i>hisC</i> | Histidinol-phosphate aminotransferase                             | 27                                | 251                                    | 9.29        |
| SAOUHSC_01397, <i>dapB</i> | 4-hydroxyl-tetrahydrodipicolinate reductase                       | 101                               | 849                                    | 8.40        |
| SAOUHSC_00174              | peptidase domain containing protein                               | 13                                | 109                                    | 8.38        |
| SAOUHSC_01398, <i>dapD</i> | 2,3,4,5-tetrahydropyridine-2,6-dicarboxylate N-acetyltransferase  | 81                                | 651                                    | 8.03        |
| SAOUHSC_00013              | homoserine O-acetyltransferase                                    | 30                                | 232                                    | 7.73        |
| SAOUHSC_01396, <i>dapA</i> | 4-hydroxy-tetrahydrodipicolinate synthase                         | 115                               | 889                                    | 7.73        |
| SAOUHSC_2605               | peptidase family protein                                          | 32                                | 234                                    | 7.31        |
| SAOUHSC_0086, <i>butA</i>  | acetoin reductase                                                 | 837                               | 5900                                   | 7.05        |
| SAOUHSC_01395, <i>asd</i>  | Aspartate semialdehyde dehydrigenase                              | 127                               | 778                                    | 6.12        |
| SAOUHSC_02271              | Sulfur transferase, TusA                                          | 51                                | 302                                    | 5.91        |
| SAOUHSC_00338, <i>metE</i> | 5-methyltetrahydropteroyl triglutamate homocysteine S-transferase | 12                                | 69                                     | 5.75        |
| SAOUHSC_01835              | Hydrolase haloaciddehydratase                                     | 78                                | 440                                    | 5.64        |
| SAOUHSC_00734              | 5' nucleotidase                                                   | 95                                | 472                                    | 4.96        |
| SAOUHSC_02374              | Aminobenoyl-glutamate protein B                                   | 50                                | 245                                    | 4.9         |
| SAOUHSC_01400, <i>alr2</i> | Alanine racemase                                                  | 60                                | 286                                    | 4.76        |
| SAOUHSC_00722, <i>pabA</i> | Para-aminobenzoate synthase                                       | 16                                | 77                                     | 4.81        |
| SAOUHSC_02941, <i>nrdG</i> | Anaerobic ribonucleoside triphosphate reductase                   | 1607                              | 7696                                   | 4.78        |
| SAOUHSC_01852              | Bifunctional 3-deoxy-7-phosphoheptulonate synthase                | 267                               | 1232                                   | 4.61        |
| SAOUHSC_00171, <i>ggt</i>  | Gamma-glutamyltranspeptidase                                      | 18                                | 82                                     | 4.55        |
| SAOUHSC_02139              | Pyrazinamidase/nicotinamidase                                     | 344                               | 1539                                   | 4.47        |
| SAOUHSC_00536, <i>ilvE</i> | Branched-chain amino acid                                         | 579                               | 2546                                   | 4.39        |

|                            |                                                              |      |       |        |
|----------------------------|--------------------------------------------------------------|------|-------|--------|
|                            | aminotransferase                                             |      |       |        |
| SAOUHSC_02373              | Peptidase family, ATP -grasp domain                          | 59   | 245   | 4.15   |
| SAOUHSC_00724, <i>pabC</i> | Chorismate binding protein                                   | 41   | 170   | 4.14   |
| SAOUHSC_00723, <i>pabB</i> |                                                              | 34   | 141   | 4.14   |
| SAOUHSC_02942, <i>nrdD</i> | Anaerobic ribonucleoside triphosphate reductase              | 1284 | 5133  | 4.0    |
| SAOUHSC_00538              | Haloacid dehalogenase-like hydrolase                         | 141  | 552   | 4.98   |
| <b>Cell wall and</b>       | <b>Transportation systems</b>                                |      |       |        |
| SAOUHSC_00717              | Electron transfer domain protein                             | 63   | 35464 | 562.92 |
| SAOUHSC_01053              | Manganese transport protein, MntH                            | 50   | 11688 | 233.76 |
| SAOUHSC_00424              | ABC transporter permease                                     | 27   | 1098  | 40.66  |
| SAOUHSC_02888              | PTS phosphotransferase system                                | 19   | 758   | 39.89  |
| SAOUHSC_00426              | ABC transporter substrate binding protein                    | 72   | 2775  | 38.54  |
| SAOUHSC_00423              | D-methionine transport system ATP binding protein            | 37   | 1383  | 37.37  |
| SAOUHSC_03020              | Energy transporter                                           | 15   | 417   | 27.8   |
| SAOUHSC_03019              | ABC transporter ATP binding protein                          | 13   | 325   | 25     |
| SAOUHSC_03018              | Energy-coupling factor transport system permease             | 8    | 165   | 20.62  |
| SAOUHSC_02389              | Cation efflux family protein                                 | 35   | 645   | 18.42  |
| SAOUHSC_00927              | Oligopeptide ABC transporter substrate binding protein       | 100  | 1543  | 15.43  |
| SAOUHSC_00925, <i>oppD</i> | Oligopeptide ABC transporter protein D                       | 81   | 1220  | 15.06  |
| SAOUHSC_00012              | Branched-chain amino acid transport protein, AzlD            | 20   | 295   | 14.75  |
| SAOUHSC_00324              | 50S ribosomal protein L7 serine acetyltransferase            | 28   | 370   | 13.21  |
| SAOUHSC_01323              | Branched-chain amino acid transport protein, AzlC            | 18   | 216   | 12     |
| SAOUHSC_00170, <i>rpl</i>  | RGD-containing lipoprotein                                   | 8    | 96    | 12     |
| SAOUHSC_02923              | Basic amino acid antiporter, APA family                      | 120  | 1434  | 11.95  |
| SAOUHSC_00136              | NitT/TauT family transport system ATP-binding protein        | 35   | 397   | 11.34  |
| SAOUHSC_00169              | peptide ABC transporter permease                             | 7    | 81    | 11.57  |
| SAOUHSC_00924, <i>oppC</i> | Oligopeptide ABC transporter protein C                       | 65   | 687   | 10.57  |
| SAOUHSC_00137              | NitT/TauT family transport system substrate -binding protein | 34   | 344   | 10.11  |
| SAOUHSC_00209              | PTS system glucose-specific transporter subunit IIBC         | 36   | 384   | 10.56  |
| SAOUHSC_00843              | D-methionine transport system permease protein               | 43   | 398   | 9.25   |
| SAOUHSC_00923, <i>oppB</i> | Oligopeptide ABC transporter protein B                       | 53   | 465   | 8.77   |
| SAOUHSC_00138              | NitT/TauT family transport system permease protein           | 36   | 310   | 8.61   |
| SAOUHSC_00949              | Alanine cation symporter                                     | 14   | 111   | 7.93   |
| SAOUHSC_02595              | Bile acid: na <sup>+</sup> symporter, BASS family            | 13   | 100   | 7.69   |
| SAOUHSC_00168              | peptide/nickel transport system permease protein             | 8    | 56    | 7.00   |
| SAOUHSC_02272              | Sulfur transport protein                                     | 23   | 150   | 6.52   |

|                            |                                                       |                               |       |        |
|----------------------------|-------------------------------------------------------|-------------------------------|-------|--------|
| SAOUHSC_02704              | Cation efflux protein                                 | 49                            | 302   | 6.16   |
| SAOUHSC_02108              | ferritin                                              | 3111                          | 17396 | 5.59   |
| SAOUHSC_02596              | Transporter –like protein                             | 11                            | 60    | 5.45   |
| SAOUHSC_02773              | transporter                                           | 131                           | 561   | 4.28   |
| <b>Cellular process</b>    |                                                       | <b>and regulatory systems</b> |       |        |
| SAOUHSC_01575              | helix-turn-helix domain-containing protein            | 0                             | 166   | 166    |
| SAOUHSC_02053              | transcriptional activator rinB-like protein           | 0                             | 143   | 143    |
| SAOUHSC_00715              | Response regulator, SaeR                              | 298                           | 31113 | 104.40 |
| SAOUHSC_02077              | Mga helix-turn-helix domain protein                   | 0                             | 72    | 72     |
| SAOUHSC_02235              | repressor                                             | 0                             | 55    | 55     |
| SAOUHSC_00714              | Sensor histidine kinase SaeS                          | 425                           | 22405 | 52.72  |
| SAOUHSC_00230, <i>lytS</i> | Two-component sensor histidine kinase                 | 102                           | 384   | 3.76   |
| <b>Virulence</b>           |                                                       | <b>factors</b>                |       |        |
| SAOUHSC_02167              | Staphylococcal complement inhibitor                   | 10                            | 32147 | 3214.7 |
| SAOUHSC_02160              | Map domain protein                                    | 27                            | 20766 | 769.11 |
| SAOUHSC_02161, <i>map</i>  | MHC class II analog protein                           | 30                            | 20205 | 673.5  |
| SAOUHSC_00401              | staphylococcal complement inhibitor SCIN              | 77                            | 36003 | 467.57 |
| SAOUHSC_01115              | Staphylococcal complement inhibitor                   | 26                            | 7600  | 292.30 |
| SAOUHSC_01114              | Fibrinogen-binding protein                            | 26                            | 7399  | 284.57 |
| SAOUHSC_02166              | Putative holing-like protein                          | 0                             | 254   | 254    |
| SAOUHSC_02706              | Immunoglobulin G-binding Sbi                          | 19                            | 3767  | 198.26 |
| SAOUHSC_02170              | Peptidoglycan hydrolase                               | 0                             | 193   | 193    |
| SAOUHSC_02708, <i>hlgA</i> | gamma-hemolysin h-gamma-II subunit                    | 12                            | 1902  | 158.5  |
| SAOUHSC_01110              | fibrinogen-binding protein-like protein               | 21                            | 3142  | 149.61 |
| SAOUHSC_01112              | formyl peptide receptor-like 1 inhibitory protein     | 34                            | 4726  | 139    |
| SAOUHSC_00354              | Staphylococcal/Streptococcal toxin, beta-grasp domain | 11                            | 1119  | 101.72 |
| SAOUHSC_02710, <i>hlgB</i> | leukocidin F subunit                                  | 37                            | 3416  | 92.32  |
| SAOUHSC_02243              | leukotoxin LukS                                       | 84                            | 5299  | 63.08  |
| SAOUHSC_02171              | staphylokinase                                        | 0                             | 55    | 55     |
| SAOUHSC_02023              | Bifunctional autolysin                                | 0                             | 42    | 42     |
| SAOUHSC_02019              | autolysin                                             | 0                             | 34    | 34     |
| SAOUHSC_01576              | exonuclease family protein                            | 0                             | 27    | 27     |
| SAOUHSC_02241              | leukotoxin LukF                                       | 130                           | 3494  | 26.87  |
| SAOUHSC_00393              | superantigen-like protein 8                           | 4                             | 91    | 22.75  |
| SAOUHSC-00816, <i>ssp</i>  | extracellular matrix and plasma binding protein       | 20                            | 407   | 20.35  |
| SAOUHSC_00394              | superantigen-like protein 9                           | 4                             | 74    | 18.5   |
| SAOUHSC_00382              | superantigen-like protein 1                           | 27                            | 464   | 17.18  |
| SAOUHSC_00191              | staphylococcal complement inhibitor                   | 5                             | 68    | 13.6   |
| SAOUHSC_00395              | superantigen-like protein 10                          | 11                            | 132   | 12     |
| SAOUHSC_01127              | superantigen-like protein                             | 10                            | 100   | 10     |
| SAOUHSC_01125              | superantigen-like protein                             | 8                             | 79    | 9.87   |
| SAOUHSC_00392              | superantigen-like protein 7                           | 8                             | 72    | 9      |
| SAOUHSC_00192              | Staphylocoagulase, Coa                                | 7                             | 46    | 6.57   |
| SAOUHSC_01124              | superantigen-like protein                             | 11                            | 68    | 6.18   |
| SAOUHSC_03045              | Cold shock protein B                                  | 7372                          | 30223 | 4.09   |
| SAOUHSC_00232              | Murein hydrolase regulator, LrgA                      | 141                           | 602   | 4.26   |

| Unknown                    | functional proteins          |      |       |       |
|----------------------------|------------------------------|------|-------|-------|
| SAOUHSC_02176              | Unknown function protein     | 0    | 492   | 492   |
| SA)UHSC_02164              | Unknown function protein     | 0    | 374   | 374   |
| SAOUHSC_01111              | Small ORF of 30 amino acids  | 16   | 1562  | 97.62 |
| SAOUHSC_01569              | Small ORF of 53 amino acids  | 0    | 74    | 74    |
| SAOUHSC_00561              | VraX, unknown function       | 646  | 13460 | 20.83 |
| SAOUHSC_02388, <i>czrA</i> | hypothetical protein         | 24   | 447   | 18.6  |
| SAOUHSC_00208              | hypothetical protein         | 29   | 332   | 11.44 |
| SAOUHSC_00135              | hypothetical protein         | 207  | 1926  | 9.3   |
| SAOUHSC_02857              | hypothetical protein         | 22   | 200   | 9.09  |
| SAOUHSC_02858              | hypothetical protein         | 17   | 150   | 8.82  |
| SAOUHSC_00962              | IDEAL domain unknown protein | 1848 | 13906 | 7.52  |
| SAOUHSC_00290, <i>pfoR</i> | hypothetical protein         | 76   | 523   | 6.88  |
| SAOUHSC_00863              | hypothetical protein         | 33   | 210   | 6.36  |

TABLE S3: RNA-seq analysis, downregulated genes ALC7907, teg49 mutant versa the wild type SH1000.

| Gene name or designation   | Gene description                                                        | Wild type SH1000 expression value | ALC7907 Teg49 mutant expression value | Fold change |
|----------------------------|-------------------------------------------------------------------------|-----------------------------------|---------------------------------------|-------------|
| Metabolism and             | <b>enzyme families</b>                                                  |                                   |                                       |             |
| SAOHSC_01198, <i>fabD</i>  | malonyl CoA-acyl carrier protein transacylase                           | 1810                              | 37                                    | 48.92       |
| SAOUHSC_00128, <i>capO</i> | Cap5O protein/UDP-N-acetyl-D-mannosaminuronic acid dehydrogenase        | 414                               | 20                                    | 20.7        |
| SAOUHSC_00120, <i>capG</i> | UDP-N-acetylglucosamine 2-epimerase                                     | 529                               | 26                                    | 20.34       |
| SAOUHSC_00125, <i>capL</i> | Cap5L protein/glycosyltransferase                                       | 376                               | 19                                    | 19.78       |
| SAOUHSC_00124, <i>capK</i> | capsular polysaccharide biosynthesis protein Cap5K                      | 135                               | 7                                     | 19.28       |
| SAOUHSC_00121, <i>capH</i> | capsular polysaccharide biosynthesis protein O-acetyl transferase Cap5H | 423                               | 22                                    | 19.22       |
| SAOUHSC_00126, <i>capM</i> | capsular polysaccharide biosynthesis protein Cap5M                      | 408                               | 22                                    | 18.54       |
| SAOUHSC_00122, <i>capI</i> | capsular polysaccharide biosynthesis protein Cap5I                      | 369                               | 20                                    | 18.45       |
| SAOUHSC_00438, <i>treC</i> | alpha amylase family protein                                            | 867                               | 48                                    | 18.06       |
| SAOUHSC_00920, <i>fabH</i> | 3-oxoacyl-ACP synthase III                                              | 1432                              | 81                                    | 17.67       |
| SAOUHSC_00123, <i>capJ</i> | capsular polysaccharide biosynthesis protein Cap5J                      | 223                               | 13                                    | 17.15       |
| SAOUHSC_00119, <i>capF</i> | capsular polysaccharide biosynthesis protein Cap5F                      | 525                               | 31                                    | 16.93       |
| SAOUHSC_00127, <i>capN</i> | cap5N protein/UDP-glucose 4-epimerase                                   | 419                               | 25                                    | 16.76       |
| SAOUHSC_00155, <i>glcA</i> | PTS system glucose specific protein                                     | 1020                              | 68                                    | 15.00       |
| SAOUHSC_00118, <i>capE</i> | capsular polysaccharide biosynthesis protein Cap5E                      | 494                               | 36                                    | 13.72       |

|                             |                                                                                  |      |      |       |
|-----------------------------|----------------------------------------------------------------------------------|------|------|-------|
| SAOUHSC_00439, <i>treR</i>  | trehalose operon transcription repressor                                         | 695  | 53   | 13.11 |
| SAOUHSC_01197, <i>plsX</i>  | glycerol-3-phosphate acyltransferase PlsX                                        | 1459 | 120  | 12.15 |
| SAOUHSC_01199, <i>fabG</i>  | 3-oxoacyl-(acyl-carrier-protein) reductase                                       | 2117 | 176  | 12.01 |
| SAOUHSC_00117, <i>capD</i>  | capsular polysaccharide biosynthesis protein Cap5D                               | 488  | 44   | 11.09 |
| SAOUHSC_02806, <i>gntP</i>  | gluconate permease                                                               | 405  | 38   | 10.65 |
| SAOUHSC_02399, <i>glmS</i>  | glucosamine--fructose-6-phosphate aminotransferase                               | 1010 | 103  | 9.80  |
| SAOUHSC_01256               | peptidase M16/insulinase                                                         | 159  | 17   | 9.35  |
| SAOUHSC_01910, <i>pckA</i>  | phosphoenolpyruvate carboxykinase                                                | 637  | 70   | 9.1   |
| SAOUHSC_01257               | 3-oxoacyl reductase                                                              | 170  | 20   | 8.50  |
| SAOUHSC_01601, <i>malA</i>  | alpha-D-1,4-glucosidase                                                          | 141  | 17   | 8.29  |
| SAOUHSC_00437, <i>treP</i>  | PTS trehalose-specific component II                                              | 2656 | 328  | 8.09  |
| SAOUHSC_00921, <i>fab</i>   | 3-oxoacyl- synthase                                                              | 2321 | 276  | 8.40  |
| SAOUHSC_01255               | peptidase M16 inactive domain protein                                            | 74   | 9    | 8.22  |
| SAOUHSC_00153, <i>ipdC</i>  | indolepyruvate decarboxylase                                                     | 113  | 14   | 8.07  |
| SAOUHSC_00239, <i>rbsK</i>  | ribokinase                                                                       | 301  | 38   | 7.92  |
| SAOUHSC_00241, <i>rbsU</i>  | Putative ribose uptake protein                                                   | 235  | 30   | 7.83  |
| SAOUHSC_00116, <i>capC</i>  | capsular polysaccharide biosynthesis protein Cap8C                               | 682  | 87   | 7.83  |
| SAOUHSC_02808, <i>gntK</i>  | gluconate kinase                                                                 | 238  | 31   | 7.67  |
| SAOUHSC_02647, <i>mgo</i>   | malate:quinone oxidoreductase                                                    | 299  | 39   | 7.66  |
| SAOUHSC_00798, <i>pgm</i>   | 2,3-bisphosphoglycerate-independent phosphoglycerate mutase                      | 7601 | 1012 | 7.51  |
| SAOUHSC_00336               | acetyl-CoA acyltransferase                                                       | 336  | 45   | 7.46  |
| SAOUHSC_00240, <i>rbsD</i>  | D-ribose pyranase                                                                | 327  | 45   | 7.26  |
| SAOUHSC_00312               | PTS ascorbate specific component II A                                            | 58   | 8    | 7.25  |
| SAOUHSC_01146, <i>mraY</i>  | phospho-N-acetylmuramoyl-pentapeptide- transferase                               | 343  | 48   | 7.14  |
| SAOUHSC_01147, <i>murD</i>  | UDP-N-acetylmuramoyl-L-alanyl-D-glutamate synthetase                             | 544  | 77   | 7.06  |
| SAOUHSC_01216, <i>sucC</i>  | succinyl-CoA synthetase subunit beta                                             | 1539 | 226  | 6.81  |
| SAOUHSC_01218, <i>sucD</i>  | succinyl-CoA synthetase subunit alpha                                            | 2142 | 316  | 6.77  |
| SAOUHSC_00579, <i>mvaK2</i> | phosphomevalonate kinase                                                         | 288  | 43   | 6.69  |
| SAOUHSC_00656               | dihydroxyacetone kinase                                                          | 174  | 26   | 6.69  |
| SAOUHSC_00129, <i>capP</i>  | UDP-N-acetylglucosamine 2-epimerase                                              | 350  | 53   | 6.60  |
| SAOUHSC_02403, <i>mtlD</i>  | mannitol-1-phosphate 5-dehydrogenase                                             | 515  | 80   | 6.40  |
| SAOUHSC_00797, <i>tpi</i>   | triosephosphate isomerase                                                        | 7834 | 1219 | 6.42  |
| SAOUHSC_00115, <i>capB</i>  | capsular polysaccharide biosynthesis protein Cap5B                               | 552  | 89   | 6.20  |
| SAOUHSC_01918               | Excalibur Ca 2+ binding protein                                                  | 1507 | 250  | 6.02  |
| SAOUHSC_00796, <i>pgk</i>   | phosphoglycerate kinase                                                          | 5085 | 848  | 5.99  |
| SAOUHSC_01611, <i>bmfBB</i> | 2-oxoisovalerate dehydrogenase, E2 component, dihydrolipoamide acetyltransferase | 526  | 89   | 5.91  |
| SAOUHSC_00311               | PTS ascorbate specific component IIB                                             | 71   | 12   | 5.91  |

|                              |                                                            |      |      |       |
|------------------------------|------------------------------------------------------------|------|------|-------|
| SAOUHSC_00577, <i>mvaK1</i>  | mevalonate kinase                                          | 164  | 28   | 5.85  |
| SAOUHSC_02401                | mannitol operon transcription antiterminator               | 197  | 34   | 5.79  |
| SAOUHSC_00146                | putative membrane protein                                  | 4608 | 814  | 5.66  |
| SAOUHSC_01857                | DNA segregation ATPase FtsK/SpoIII family                  | 485  | 86   | 5.63  |
| SAOUHSC_01612, <i>bfmBAB</i> | 2-oxoisovalerate dehydrogenase, E1 component subunit beta  | 506  | 91   | 5.56  |
| SAOUHSC_00578, <i>mvaD</i>   | mevalonate diphosphate decarboxylase                       | 244  | 44   | 5.54  |
| SAOUHSC_02885                | acyltransferase family                                     | 501  | 92   | 5.44  |
| SAOUHSC_02869, <i>rocA</i>   | 1-pyrroline-5-carboxylate dehydrogenase                    | 409  | 76   | 5.38  |
| SAOUHSC_00309                | short chain dehydrogenase                                  | 545  | 102  | 5.34  |
| SAOUHSC_01845, <i>fhs</i>    | formate--tetrahydrofolate ligase                           | 1203 | 226  | 5.32  |
| SAOUHSC_01614, <i>lpdA</i>   | dihydrolipoamide dehydrogenase                             | 403  | 76   | 5.30  |
| SAOUHSC_01613, <i>bfmBAA</i> | 2-oxoisovalerate dehydrogenase, E1 component subunit alpha | 503  | 95   | 5.29  |
| SAOUHSC_02377, <i>pdp</i>    | pyrimidine-nucleoside phosphorylase                        | 724  | 138  | 5.34  |
| SAOUHSC_00799, <i>eno</i>    | phosphopyruvate hydratase                                  | 9964 | 1905 | 5.23  |
| SAOUHSC_02926                | fructose-1,6-bisphosphate aldolase                         | 3339 | 647  | 5.16  |
| SAOUHSC_00710, <i>nagA</i>   | N-acetylglucosamine-6-phosphate deacetylase                | 198  | 39   | 5.07  |
| SAOUHSC_01418, <i>kgd</i>    | 2-oxoglutarate dehydrogenase E1 component                  | 1045 | 208  | 5.02  |
| SAOUHSC_02793                | phosphoglucomutase                                         | 105  | 21   | 5.00  |
| SAOUHSC_00655                | dihydroxyacetone kinase subunit DhaK                       | 134  | 27   | 4.96  |
|                              |                                                            |      |      |       |
| <b>Cell wall and</b>         | <b>transporter systems</b>                                 |      |      |       |
|                              |                                                            |      |      |       |
| SAOUHSC_00634                | ABC transport substrate binding protein                    | 2646 | 191  | 13.85 |
| SAOUHSC_00636                | iron (chelated) ABC transporter permease                   | 1839 | 152  | 12.09 |
| SAOUHSC_02848, <i>ptsG</i>   | PTS system glucose-specific transporter subunit IIBC       | 920  | 85   | 10.82 |
| SAOUHSC_00637                | Mn 2+/Zn2+ transport system ATP binding protein            | 2242 | 220  | 10.19 |
| SAOUHSC_02661, <i>scrA</i>   | PTS system sucrose-specific transporter subunit IIBC       | 1821 | 229  | 7.95  |
| SAOUHSC_02986                | accessory Sec system protein Asp3                          | 74   | 11   | 6.72  |
| SAOUHSC_00658                | PTS system mannose-specific family transporter subunit IIA | 165  | 25   | 6.60  |
| SAOUHSC_01456                | PepSY associated transmembrane protein                     | 120  | 20   | 6.00  |
| SAOUHSC_02753                | ABC transport system permease                              | 278  | 47   | 5.91  |
| SAOUHSC_02402, <i>mtlA</i>   | PTS system mannitol-specific transporter subunit IIA       | 435  | 74   | 5.87  |
| SAOUHSC_02987                | accessory Sec system protein Asp2                          | 69   | 12   | 5.75  |
| SAOUHSC_02662, <i>ptsIIB</i> | PTS system sucrose-specific                                | 1181 | 204  | 5.78  |



|                            |                                                       |                  |                |       |
|----------------------------|-------------------------------------------------------|------------------|----------------|-------|
|                            | transporter subunit IIBC                              |                  |                |       |
| SAOUHSC_00625, <i>mnhA</i> | monovalent cation/H <sup>+</sup> antiporter subunit A | 102              | 19             | 5.36  |
|                            |                                                       |                  |                |       |
| <b>Cellular process,</b>   | <b>transcriptional regulators, and</b>                | <b>virulence</b> | <b>factors</b> |       |
|                            |                                                       |                  |                |       |
| SAOUHSC_01196              | fatty acid biosynthesis transcriptional regulator     | 1075             | 115            | 9.34  |
| SAOUHSC_01204, <i>smc</i>  | SMC domain-containing protein                         | 209              | 35             | 5.97  |
| SAOUHSC_01206              | DNA-binding protein                                   | 259              | 47             | 5.51  |
|                            |                                                       |                  |                |       |
| <b>Unknown</b>             | <b>function proteins</b>                              |                  |                |       |
|                            |                                                       |                  |                |       |
| SAOUHSC_00154              | hypothetical small peptide of 33 amino acids          | 263              | 23             | 11.43 |
| SAOUHSC_01200              | hypothetical small peptide of 32 amino acids          | 1585             | 163            | 9.72  |
| SAOUHSC_00280              | hypothetical protein                                  | 328              | 34             | 9.64  |
| SAOUHSC_02905              | unknown domain protein                                | 55               | 7              | 7.85  |
| SAOUHSC_02378              | hypothetical small peptide of 42 amino acids          | 247              | 39             | 6.33  |
| SAOUHSC_01919              | unknown domain protein                                | 1405             | 222            | 6.32  |
| SAOUHSC_00838              | unknown domain protein                                | 214              | 34             | 6.29  |
| SAOUHSC_02701              | hypothetical protein                                  | 259              | 41             | 6.31  |
| SAOUHSC_00279              | unknown domain protein                                | 106              | 17             | 6.23  |
| SAOUHSC_02663              | unknown domain protein                                | 226              | 39             | 5.79  |
| SAOUHSC_01859              | unknown domain protein                                | 158              | 31             | 5.09  |
